# Supplementary material for: Tailoring the electronic structure of an exfoliated layered double hydroxide using a lanthanide for chloride-ion blocking in seawater splitting
Source: Royal Society of Chemistry journal article supplement (doi:10.1039/d4ey00278d), 2025-01-01
Supplement: d4ey00278d1.pdf [file d4ey00278d1.pdf]

## Supplementary Materials for

### **Tailoring Electronic Structure of Exfoliated Layered Double Hydroxide by Lanthanide for Chloride-Ion Blocking in Seawater Splitting**

*Ashish Gaur, ‡,<sup>a</sup> Jiseok Kwon, ‡,<sup>b</sup> Jatin Sharma,<sup>a</sup> Ghulam Ali,<sup>c</sup> Enkhtuvshin Enkhbayar,<sup>a</sup> Chan-Yeup Chung<sup>\*d</sup>, HyukSu Han<sup>\*,a</sup>, Taeseup Song<sup>\*,b</sup>*

- a. Department of Energy Science, Sungkyunkwan University, 2066 Seobu-ro, Jangan-gu, Suwon-si, Gyeonggi-do 16419, Republic of Korea*
  - b. Department of Energy Engineering, Hanyang University, 222 Wangsimni-ro, Seongdong-gu, Seoul 04763, Republic of Korea*
  - c. U.S.-Pakistan Center for Advanced Studies in Energy (USPCASE), National University of Sciences and Technology (NUST), H-12, Islamabad, Pakistan*
  - d. Bass Co. LTD., 1121 Beoman-ro, Geumcheon-gu, Seoul, 08594, Republic of Korea*
- ‡ = both the authors contributed equally*

*\*Corresponding author. chanyeup.chung@gmail.com (C.Y.C), hyuksuhan@skku.edu (H.H.), tssong@hanyang.ac.kr (T.S)*

## Contents

|                                                                                                                                                    |    |
|----------------------------------------------------------------------------------------------------------------------------------------------------|----|
| • <b>Materials and Methods</b> .....                                                                                                               | 3  |
| • <b>Supplementary Figure 1.</b> XPS survey spectra.....                                                                                           | 7  |
| • <b>Supplementary Figure 2.</b> XPS spectra of Ce3d.....                                                                                          | 8  |
| • <b>Supplementary Figure 3.</b> Atomic percentage of elements from EDX.....                                                                       | 9  |
| • <b>Supplementary Figure 3.</b> XANES spectra of Ce L3 edge.....                                                                                  | 10 |
| • <b>Supplementary Figure 4.</b> CCWT plot of Ce-L3 edge.....                                                                                      | 11 |
| • <b>Supplementary Figure 5.</b> EXAFS spectra of Ni-kedge, Fe-Kedge and Ce-L3 edge.....                                                           | 12 |
| • <b>Supplementary Figure 6.</b> CCWT plot of the standards.....                                                                                   | 13 |
| • <b>Supplementary Figure 7.</b> ECSA normalized LSV curves for OER.....                                                                           | 14 |
| • <b>Supplementary Figure 8.</b> Cyclic voltammetry curve for the elucidation of ECSA.....                                                         | 15 |
| • <b>Supplementary Figure 9.</b> ECSA normalized LSV curves for the HER.....                                                                       | 16 |
| • <b>Supplementary Figure 10.</b> Digital photographs of the iodide titration measurement.....                                                     | 17 |
| • <b>Supplementary Figure 10.</b> Tafel scans for the estimation of corrosion potential.....                                                       | 18 |
| • <b>Supplementary Figure 11.</b> STEM-EDS mapping and TEM images after OER stability.....                                                         | 19 |
| • <b>Supplementary Figure 12.</b> STEM-EDS mapping and TEM images after HER stability.....                                                         | 20 |
| • <b>Supplementary Figure 13.</b> PXRD pattern after OER stability.....                                                                            | 21 |
| • <b>Supplementary Figure 14.</b> PXRD pattern after HER stability.....                                                                            | 22 |
| • <b>Supplementary Figure 15.</b> Electrochemical activity of the CNF-LDH-E in the real alkaline seawater.....                                     | 23 |
| • <b>Supplementary Table 1.</b> Comparison of the bifunctional activity of the catalyst with state-of-the-art catalyst in alkaline freshwater..... | 24 |
| • <b>Supplementary Table 2.</b> Comparison of the bifunctional activity of the catalyst with state-of-the-art catalyst in alkaline seawater.....   | 25 |
| • <b>Supplementary Table 3.</b> Surface energies pf the different plane obtained from the DFT calculations.....                                    | 26 |

## **Materials and Methods**

### **Chemicals**

Nickel (II) nitrate hexahydrate ( $\text{Ni}(\text{NO}_3)_2 \cdot 6\text{H}_2\text{O}$ , 98%), Iron (III) chloride hexahydrate ( $\text{FeCl}_3 \cdot 6\text{H}_2\text{O}$ , 99%), Cerium (III) nitrate hexahydrate ( $\text{Ce}(\text{NO}_3)_3 \cdot 6\text{H}_2\text{O}$ , 99%), Hexamethylenetetramine ( $\text{C}_6\text{H}_{12}\text{N}_4$ , 99%), Sodium hydroxide ( $\text{NaOH}$ , 99.9%), Sodium chloride ( $\text{NaCl}$ , 99%), Hydrochloric acid ( $\text{HCl}$ , 37%) were purchased from Sigma-Aldrich (Germany). Nickel foam was purchased from Alfa Aesar. All chemicals were used as purchased without further treatment.

### **Fabrication of the NF-LDH:**

The as obtained nickel foam was first subjected to acid treatment for removing the oxide layer and impurities from the surface. The NF has been sonicated for the 5 min with the HCL solution (37 wt%). Hydrothermal method was used for the fabrication of the NF-LDH. In 50 ml deionized water (DI) 4 mmol of  $\text{Ni}(\text{NO}_3)_2 \cdot 6\text{H}_2\text{O}$ , 1 mmol of  $\text{FeCl}_3 \cdot 6\text{H}_2\text{O}$  and 2 mmol of  $\text{C}_6\text{H}_{12}\text{N}_4$  were dissolved and stirred for 30 minutes. After this the solution has been transferred to the 100 mL autoclave containing NF and kept in oven at  $130^\circ\text{C}$  for 10 h. After this the obtained NF-LDH was washed and dried in the oven at  $60^\circ\text{C}$  for 12 h.

### **Fabrication of the CNF-LDH:**

The fabrication process for the CNF-LDH is also like the NF-LDH except the addition of the 0.15 mmol of the  $\text{Ce}(\text{NO}_3)_3 \cdot 6\text{H}_2\text{O}$  in the same solution.

### **Fabrication of the CNF-LDH-E:**

After the synthesis of the CNF-LDH-E the electrode was immersed in the highly diluted acid solution of HCl (0.1 mM), the solution was heated in the sealed tube at  $85^\circ\text{C}$  for the 8 h. After this the electrode was removed, washed properly with ethanol and water and dried. The obtained electrode was further subjected to the nonthermal oxygen plasma treatment for the 120 seconds. Finally, the electrode was dipped in the 0.5 M  $\text{NaBH}_4$  solution for the 30 min. The as obtained CNF-LDH-E was cleaned and dried properly for the further use. Similar method was used for the fabrication of the NF-LDH-E.

## X-ray absorption spectroscopy

The synchrotron-based X-ray absorption spectroscopy was performed on 1D, 8C, and 10D beamlines of the Pohang Acceleration Laboratory (PAL, Korea) in top-up mode at 3.0 GeV with maximum ring current of 300 mA. To ensure accurate measurements, the harmonics of the incident X-ray beam were adjusted using a double crystal monochromator (DCM) with Si(111) crystals. Prior to data acquisition, energy calibration was performed using reference metallic foils. Specifically, Ir, Ni and Re transmission mode was employed to acquire the XAS data, with Fe, Ni and Ce metallic foils serving as reference standards. Subsequent data analysis was conducted using the ATHENA software suite<sup>1, 2</sup>. For the visualization of wavevector and interatomic distance (R) data in three dimensions, continuous Cauchy Wavelet Transform (CCWT) analysis was conducted. The analysis utilized  $k^2$ -weighted signals over a  $k$ -space range of 2.0 – 12.0  $\text{\AA}^{-1}$ . Near Edge X-ray Absorption Fine Structure (NEXAFS) spectra were obtained for the Ni K, Fe K and Ce  $L_3$  edges, at the 10D beamline equipped with a bending magnet at PAL. Measurements were performed at room temperature with a resolution of 0.01 eV. Spectra were acquired in both total electron yield (TEY) and fluorescence yield (FY) modes under a base pressure of  $3 \times 10^{-10}$  Torr.

## Electrochemical measurements

The electrocatalytic performance was assessed using a three-electrode system connected and operated by a potentiostation (Autolab PGSTAT; Metrohm) under alkaline and seawater conditions (1M KOH, 1M KOH+ 0.5 M NaCl). The three-electrode system contains the self-standing catalysts as a working electrode, Ag/AgCl is used as a reference electrode and graphitic electrode as a counter electrode. Purging of the  $N_2$  in the electrolyte was performed before starting any electrochemical measurement. The exposed surface area of the working electrode in the electrolyte was 1  $\text{cm}^2$ . The ink preparation for the  $\text{IrO}_2$  and Pt/C was carried out by using 5 mg of each sample and dissolved in the 490  $\mu\text{L}$  of the ethanol and 10  $\mu\text{L}$  of nafion. Out of this 30  $\mu\text{L}$  was drop casted over the nickel foam (NF). All the polarization curves were taken at the scan rate of the  $5 \text{mV s}^{-1}$ . The conversion of the potential to the reversible hydrogen electrode (RHE) by performed by the equation,  $E(\text{RHE}) = E(\text{Ag}/\text{AgCl}) + 0.059 \text{ pH} + E^\circ (\text{Ag}/\text{AgCl})$ . 90%  $iR$  correction were performed to the polarization curves. Electrochemical impedance spectroscopy (EIS) was performed at 1.57  $V_{\text{RHE}}$  in a frequency range from 0.1 to 100 kHz with a sinusoidal amplitude of 5 mV. Tafel plots were obtained using the  $iR$ -corrected LSV polarization curves. The Tafel slopes were calculated using the equation:  $\eta = b \log j + a$ , where (b: Tafel slope, j: current density,  $\eta$ : overpotential).

## Density functional theory calculations

The first-principle calculations were conducted based on density functional theory (DFT) using the exchange-correlation energy function correlated by Perdew-Burke-Ernzerhof (PBE) with the generalized gradient approximation (GGA). [1] Self-consistent electronic density functional and total energy was obtained with the pseudopotential using the Vienna *ab initio* simulation package (VASP) code [2]. The plane wave basis set extended to 520 eV energy cutoff. In cases of transition metal cations, the pseudopotentials involving electrons in *p* and *d* orbitals of Ni and Fe as valence electrons (*Ni\_pv* and *Fe\_pv*) were used. Also, GGA+U correction scheme for transition metal cations such as Ni and Fe was adopted to correct energy of strongly correlated *3d* orbitals. [3] The Hubbard U values on Ni and Fe used in this calculation were 6.2 eV and 5.3 eV, respectively. The self-consistent loop was repeated until the total energy difference of systems between the adjacent repeating steps were less than  $10^{-5}$  eV. To calculate wave functions in the LDH, only  $\Gamma$ -point was considered in irreducible Brillouin zone. Two different slab models with the lowest surface energy of  $\text{Ni}_{10.9}\text{Fe}_{0.1}(\text{OH})_2$  (001) and  $\text{Ni}_3\text{Fe}$  (111) were generated to calculate surface reactions. Those slab models were optimized by conjugate-gradient method [4] with DFT-D2 Van der Waals energy correction [5] until the maximum Hellmann-Feynman force became in  $\pm 0.025$  eV/Å.

## Supplementary Notes

### Supplementary Note 1. Calculation of electrochemical surface area (ECSA)

Cyclic voltammetry curves were taken in the non-faradaic range in  $\text{N}_2$ -saturated 1M KOH solution, Further the differences in the current densities ( $J_{\text{anodic}} - J_{\text{cathodic}}$ ) were plotted against the multiple scan rates. The slope of this curve is the measured double-layer capacitance ( $C_{\text{dl}}$ ).

The higher the  $C_{\text{dl}}$  higher will be the ECSA. The specific capacitance used for the calculation of the ECSA is  $0.04 \text{ mF cm}^{-2}$ . Then, the ECSA is calculated using the formula.

$$ECSA = \frac{C_{\text{dl of the catalyst}} (\text{mF cm}^{-2})}{0.04 (\text{mF cm}^{-2})}$$



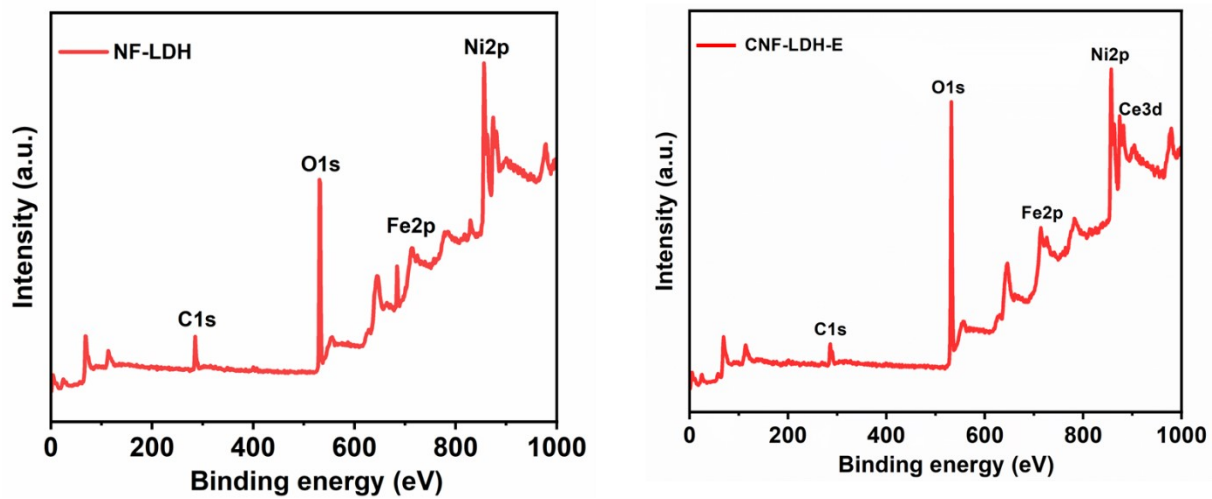

Figure S1. XPS survey spectra of the NF-LDH and CNF-LDH-E

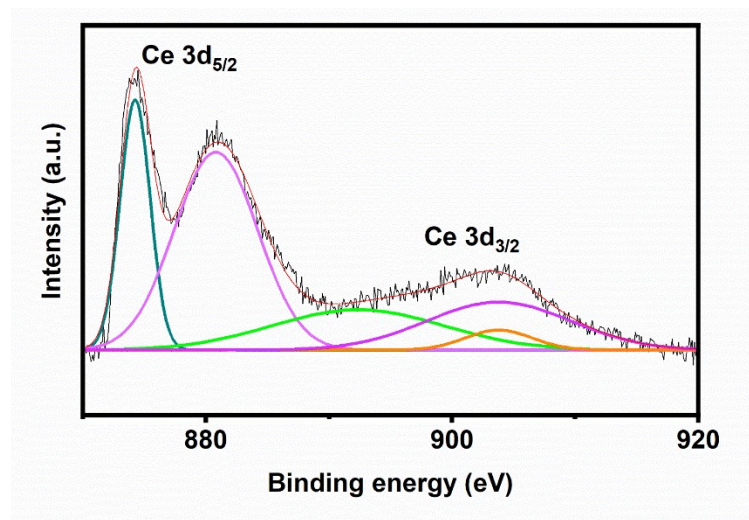

Figure S2: XPS spectra of the Ce3d present in CNF-LDH-E



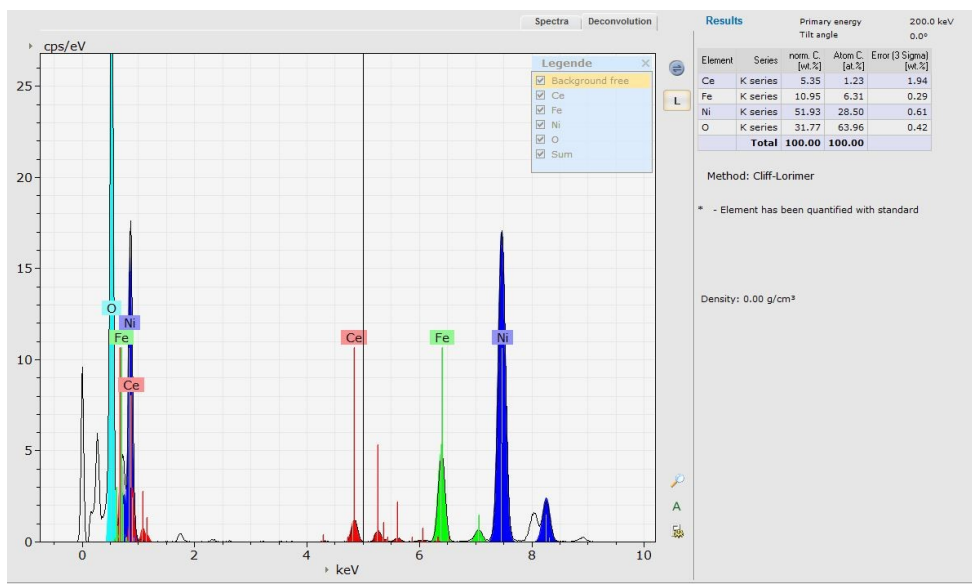

Figure S3. Atomic percentage of the Ce, Ni, Fe and O present in the catalyst by EDX

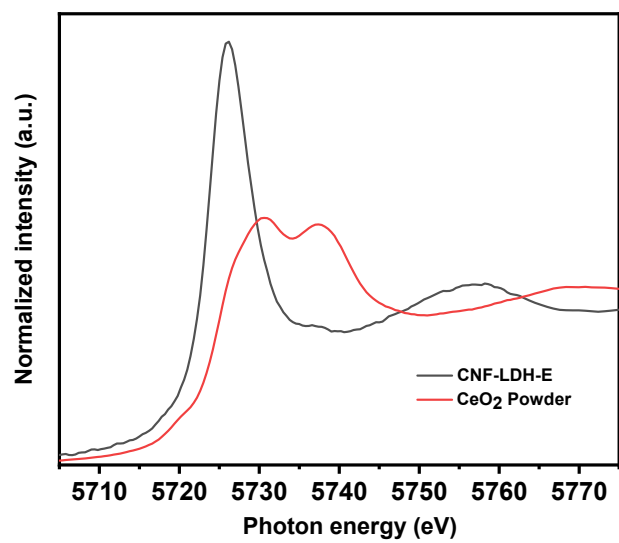

Figure S4. XANES spectra of Ce-L3 edge

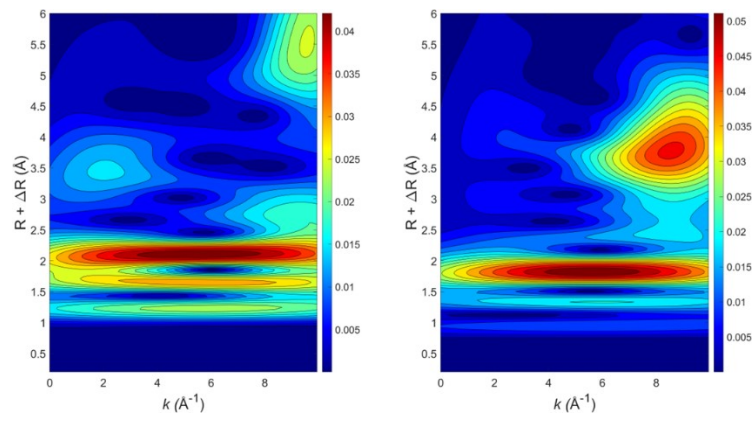

Figure S5: CCWT plot of Ce-L3edge in CNF-LDH-E and  $\text{CeO}_2$

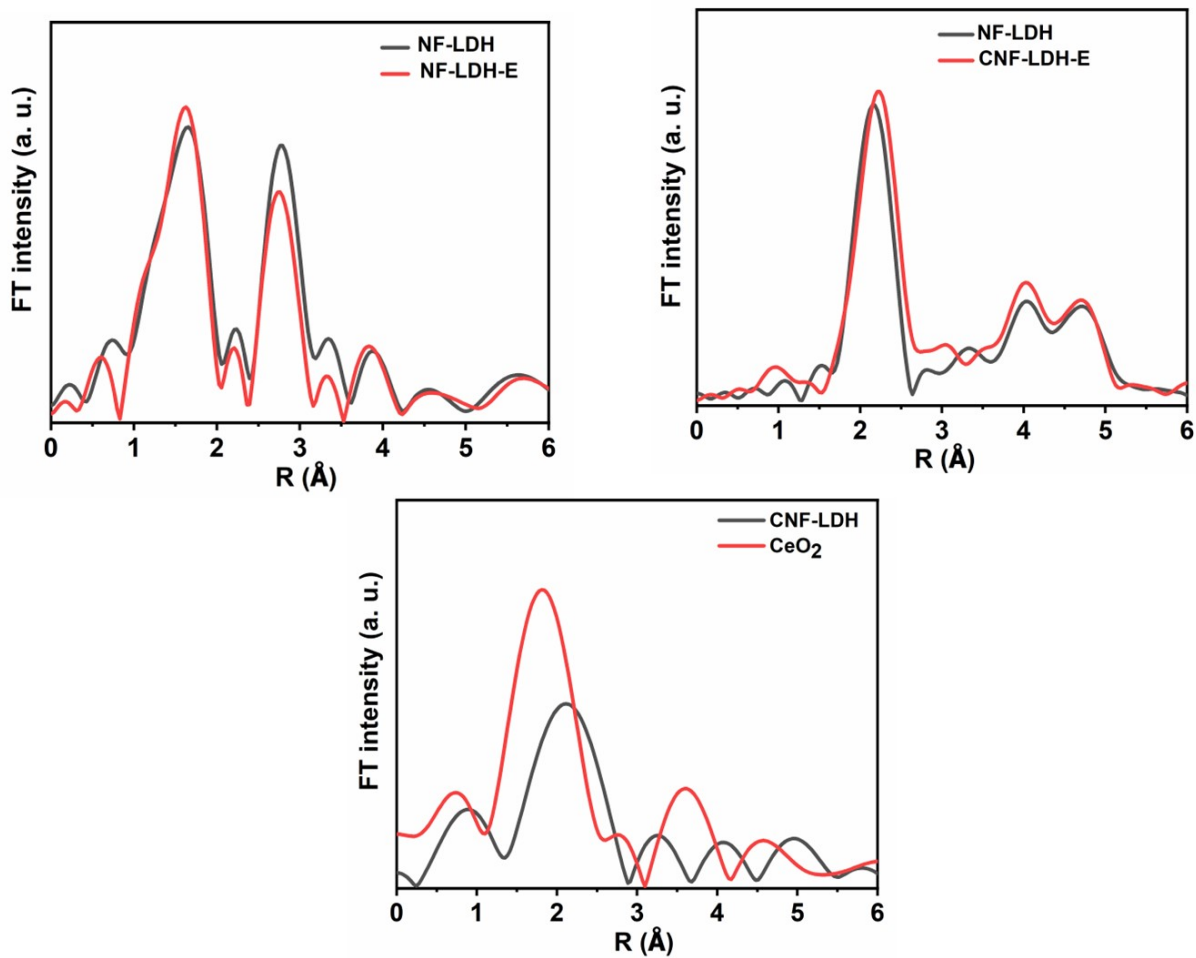

Figure S6: EXAFS spectra of Fe-Ledge, Ni-Kedge and Ce-L3edge

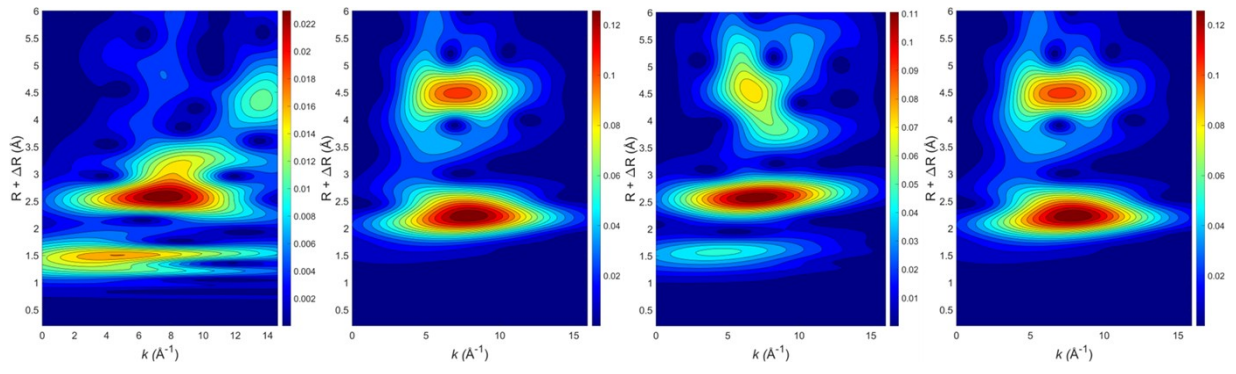

Figure S7: CCWT plot of Fe<sub>2</sub>O<sub>3</sub>, Fe-foil, NiO and Ni-foil

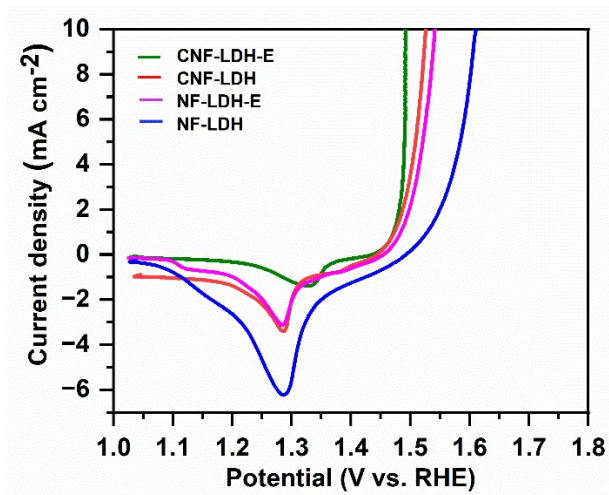

Figure S8: ECSA normalized OER activity

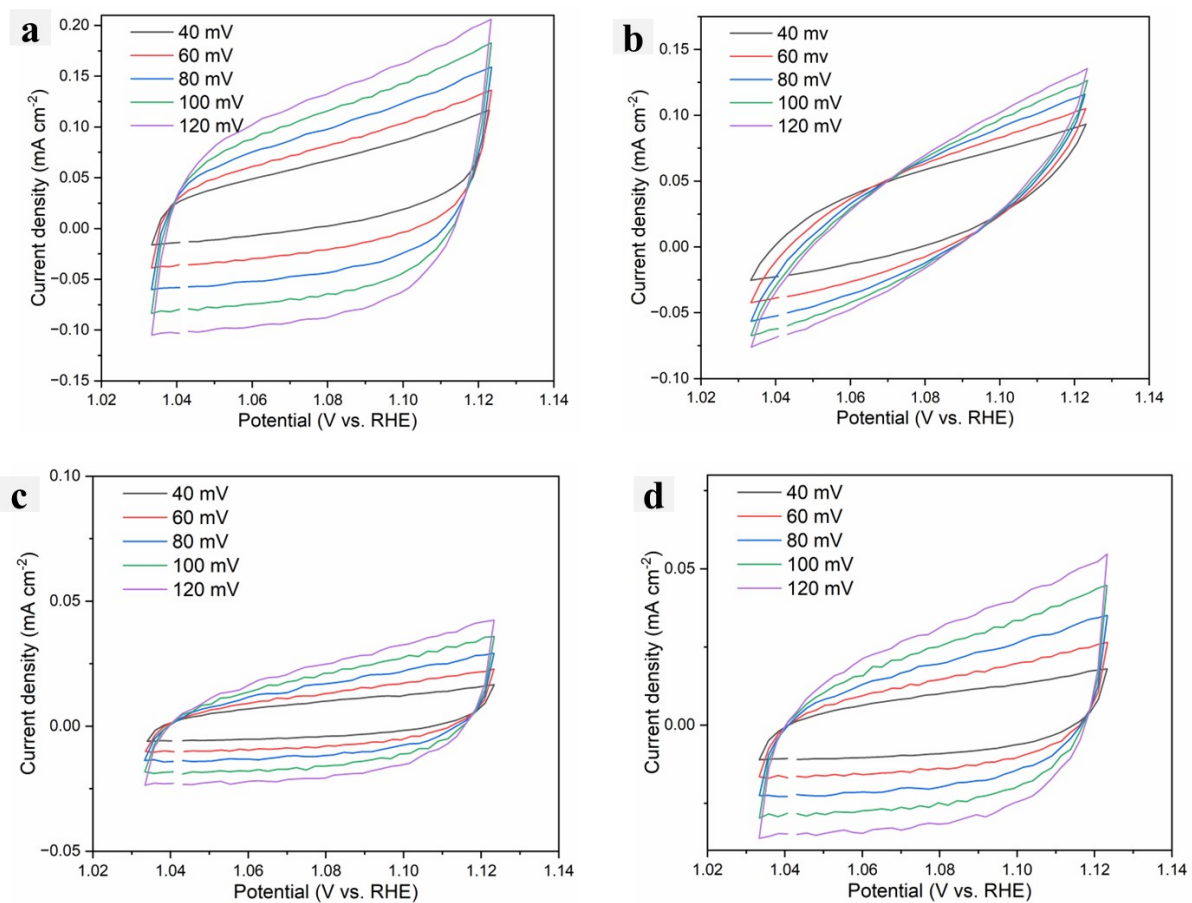

Figure S9: cyclic voltammetry curve in the non-faradaic region for the (a) CNF-LDH-E, (b) CNF-LDH, (c) NF-LDH-E, (d) NF-LDH

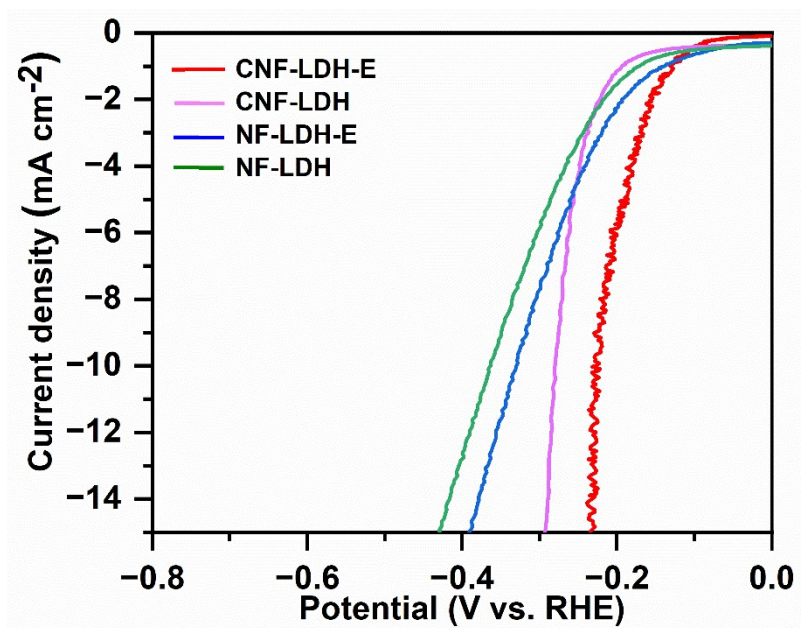

Figure S10: ECSA normalized LSV curve for the HER



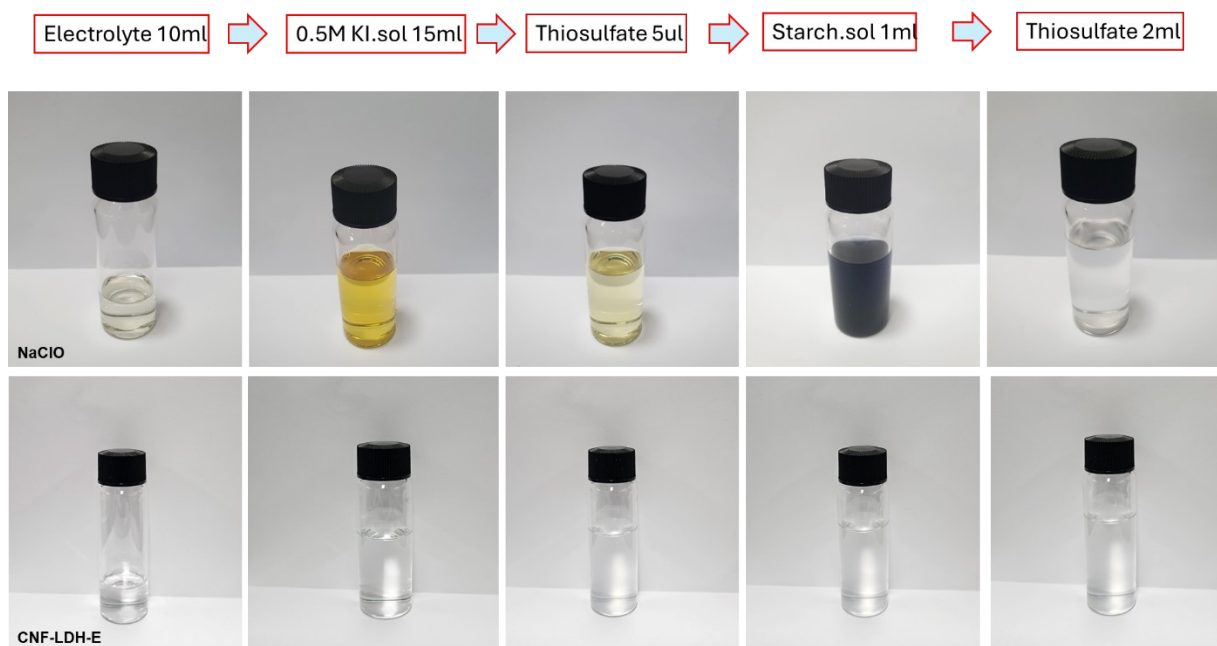

Figure S11: Digital photographs for iodide titration experiments for (upper) NaClO reference solution and (lower) the electrolyte solution after 30 h at  $100 \text{ mA cm}^{-2}$  in 1 M KOH and 0.5 M NaCl using CNF-LDH-E as a working electrode.

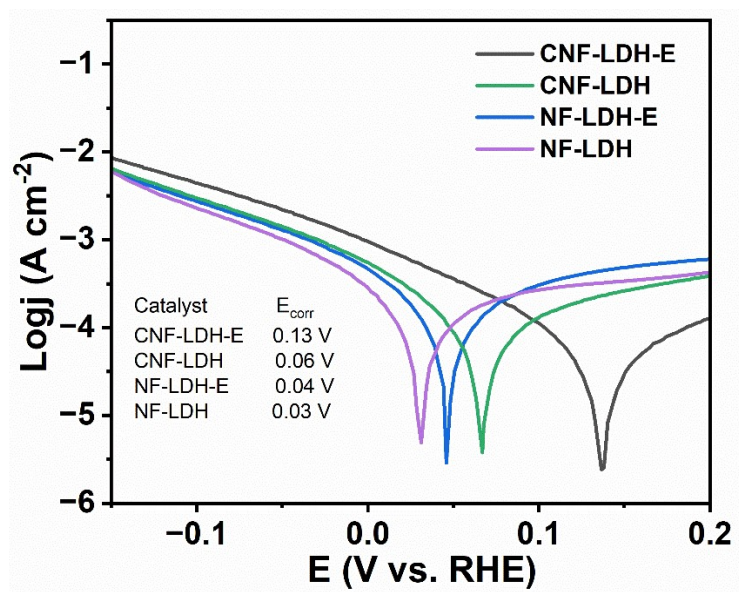

Figure S12. Tafel plots of all the catalyst in the electrolyte containing 1M KOH + 0.5 M NaCl

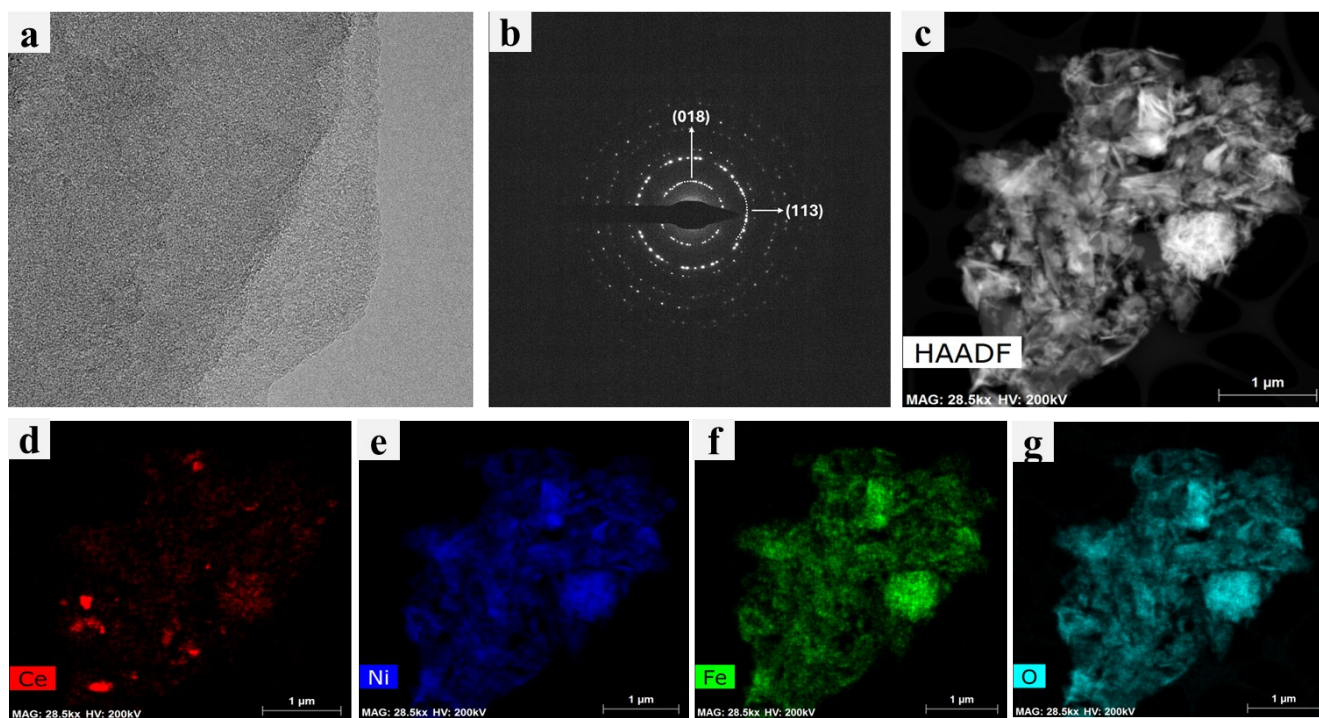

Figure S13: (a) TEM image of the catalyst after durability test for HER, (b) SAED pattern, (c-g) STEM-EDS mapping

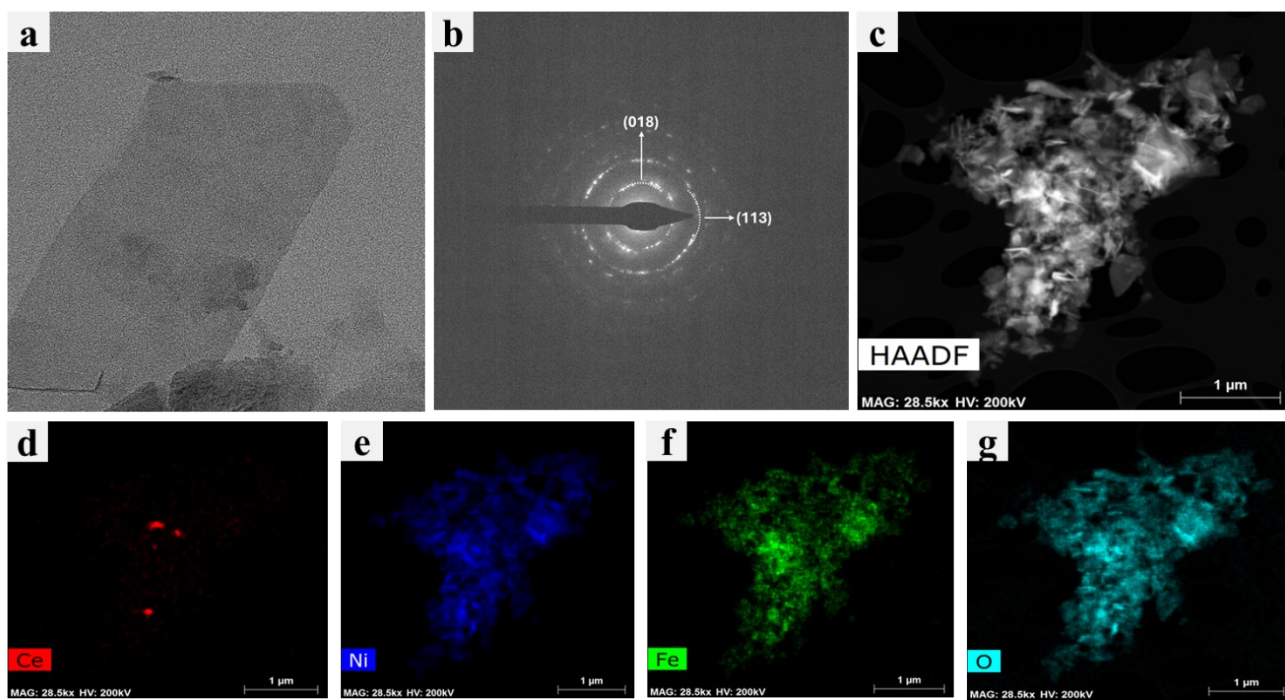

Figure S14: (a) TEM image of the catalyst after durability test for OER, (b) SAED pattern, (c-g) STEM-EDS mapping

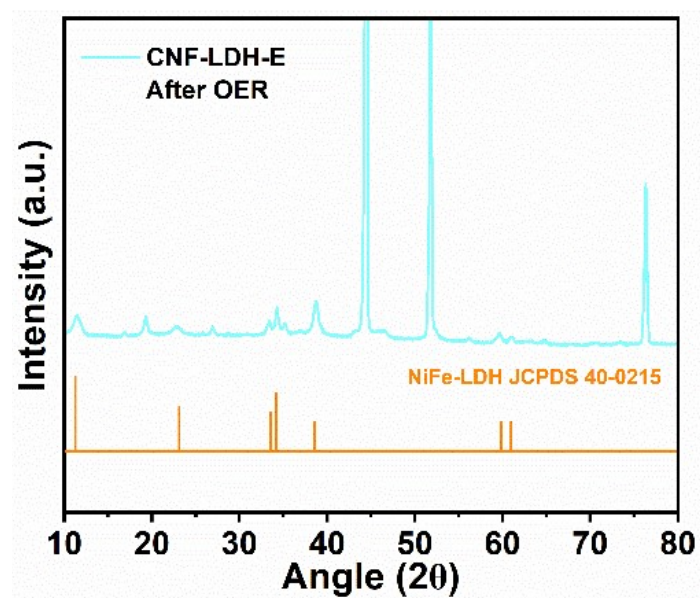

Figure S15: PXRD pattern of the catalyst after durability test for OER

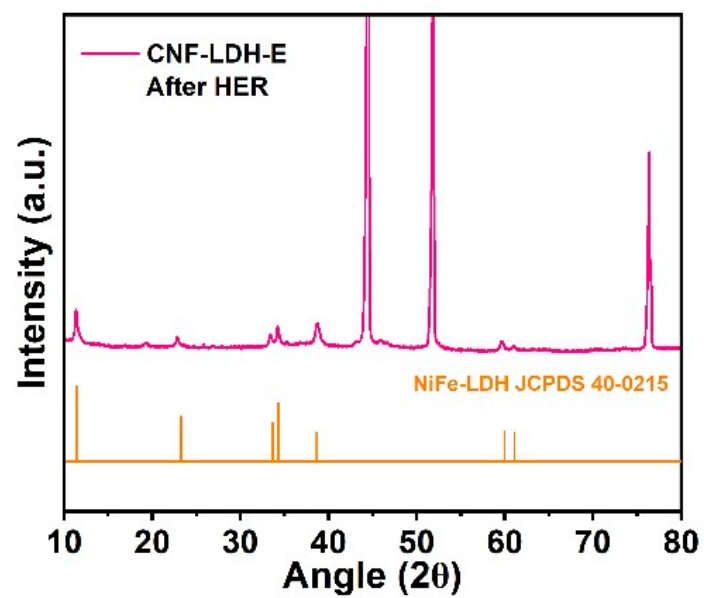

Figure S16: PXRD pattern of the catalyst after durability test for OER

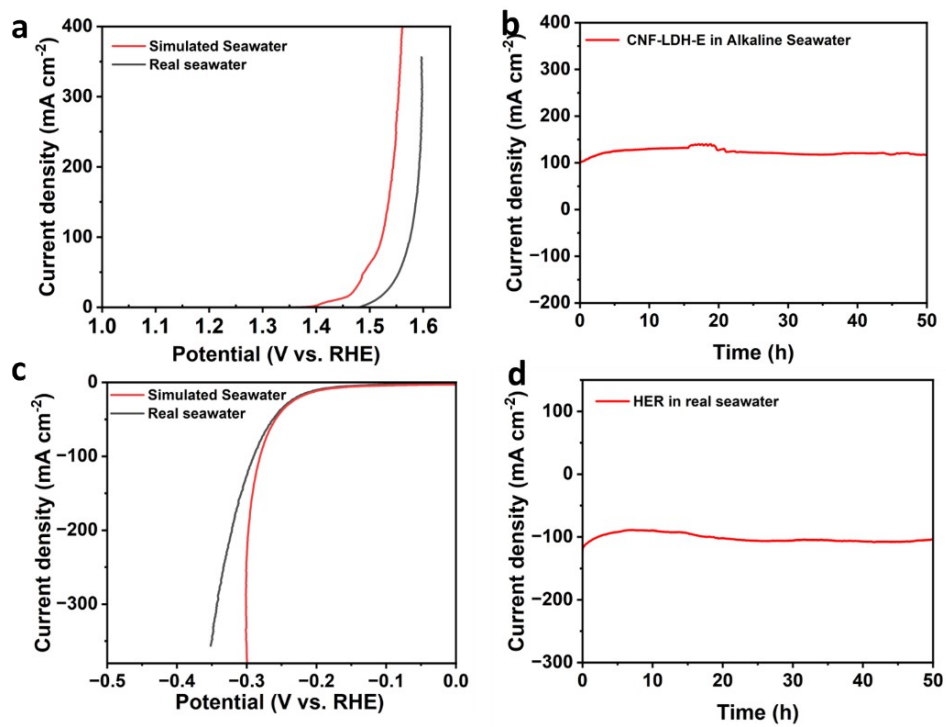

Figure S17. (a) polarization curve of the catalyst in the real alkaline seawater for OER (b) corresponding durability test (c) Polarization curve of CNF-LDH-E for the HER (d) corresponding durability test.

Table S1: Comparison of the overall water splitting behavior of our catalyst with the recently publishes state of the art catalyst in 1M KOH

| Catalyst                                           | Overpotential (HER) (mV)         | Overpotential (OER) (mV)         | Reference (Journal)     |
|----------------------------------------------------|----------------------------------|----------------------------------|-------------------------|
| Ir@Ni-NDC                                          | 74@10 mAcm <sup>-2</sup>         | 210@10 mAcm <sup>-2</sup>        | 6 (Angew. Chem.)        |
| CPF-Fe/Ni                                          | 201@10 mAcm <sup>-2</sup>        | 194@10 mAcm <sup>-2</sup>        | 7 (Nature Comm.)        |
| Ni <sub>2</sub> P/FeP-FF                           | 42@10 mAcm <sup>-2</sup>         | 217@10 mAcm <sup>-2</sup>        | 8 (AFM)                 |
| Ru@V-RuO <sub>2</sub>                              | 201@10 mAcm <sup>-2</sup>        | 6@10 mAcm <sup>-2</sup>          | 9 (Adv. Mater.)         |
| V-NiS/NiS <sub>2</sub>                             | 94@10 mAcm <sup>-2</sup>         | 220@10 mAcm <sup>-2</sup>        | 10 (Adv. Energy Mater.) |
| Mn-NiCoP                                           | 148@100 mAcm <sup>-2</sup>       | 266@100 mAcm <sup>-2</sup>       | 11 (Nano Energy)        |
| Ni <sub>2</sub> P-MnP@Co <sub>2</sub> P            | 60@10 mAcm <sup>-2</sup>         | 255@30 mAcm <sup>-2</sup>        | 12 (Appl. Cat. B)       |
| FeNi(OH) <sub>x</sub> @NF                          | 210@50 mAcm <sup>-2</sup>        | 198@10 mAcm <sup>-2</sup>        | 13 (Small)              |
| CuNi@NiSe                                          | 42@10 mAcm <sup>-2</sup>         | 293@10 mAcm <sup>-2</sup>        | 14 (Small)              |
| Mo-NiFeP/NiF                                       | 186@50 mAcm <sup>-2</sup>        | 227@50 mAcm <sup>-2</sup>        | 15 (Chem. Eng. J.)      |
| MnCo <sub>2</sub> S <sub>4</sub> @MoS <sub>2</sub> | 208@1000 mAcm <sup>-2</sup>      | 332@1000 mAcm <sup>-2</sup>      | 16 (Chem. Eng. J.)      |
| AF <sub>0.1</sub> -FNMO/IF                         | 345@500 mAcm <sup>-2</sup>       | 289@500 mAcm <sup>-2</sup>       | 17 (CCL)                |
| Fe <sub>2</sub> P/Co <sub>2</sub> N                | 131@500 mAcm <sup>-2</sup>       | 283@500 mAcm <sup>-2</sup>       | 18 (AFM)                |
| IF-Ni 150 mM                                       | 128@100 mAcm <sup>-2</sup>       | -                                | 19 (ACS Nano)           |
| <b>CNF-LDH-E</b>                                   | <b>162@100 mAcm<sup>-2</sup></b> | <b>154@100 mAcm<sup>-2</sup></b> | <b>This work</b>        |



Table S2: Comparison of the overall water splitting behavior of our catalyst with the recently publishes state of the art catalyst in 1M KOH+0.5M NaCl

| Catalyst                                                    | Overpotential (HER)<br>(mV)      | Overpotential (OER)<br>(mV)      | Reference (Journal) |
|-------------------------------------------------------------|----------------------------------|----------------------------------|---------------------|
| Fe <sub>0.74</sub> Co <sub>0.26</sub> )2P/Ni <sub>3</sub> N | 113@100 mAcm <sup>-2</sup>       | 212@100 mAcm <sup>-2</sup>       | 20 (Small)          |
| RuNCs/P,O-NiFeLDH/NF                                        | 175@10 mAcm <sup>-2</sup>        | 29@10 mAcm <sup>-2</sup>         | 21 (AFM)            |
| Ni <sub>2</sub> P-Fe <sub>2</sub> P                         | 252@100 mAcm <sup>-2</sup>       | 305@100 mAcm <sup>-2</sup>       | 22 (AFM)            |
| c-NF//a-NF-LDH NS                                           | 200@100 mAcm <sup>-2</sup>       | 300@100 mAcm <sup>-2</sup>       | 23 (AFM)            |
| NiMoN@NiFeN                                                 | --                               | 286@100 mAcm <sup>-2</sup>       | 24 (Nature Comm.)   |
| Mn-doped Ni <sub>2</sub> P/Fe <sub>2</sub> P                | 470@1000 mAcm <sup>-2</sup>      | 358@1000 mAcm <sup>-2</sup>      | 25 (Chem. Eng. J.)  |
| N-NiMo <sub>3</sub> P                                       | 35@10 mAcm <sup>-2</sup>         | 346@10 mAcm <sup>-2</sup>        | 26 (Small)          |
| FMCO/NF                                                     | 248@50 mAcm <sup>-2</sup>        | 328@50 mAcm <sup>-2</sup>        | 27 (Appl. Cat. B)   |
| Co <sub>x</sub> P <sub>v</sub> @NC                          | 206@500 mAcm <sup>-2</sup>       | 323@500 mAcm <sup>-2</sup>       | 28 (Nano energy)    |
| NiFeLDH/FeOOH                                               | 181@10 mAcm <sup>-2</sup>        | 286@100 mAcm <sup>-2</sup>       | 29 (ACS IC)         |
| <b>CNF-LDH-E</b>                                            | <b>281@100 mAcm<sup>-2</sup></b> | <b>290@100 mAcm<sup>-2</sup></b> | <b>This work</b>    |

**Table S3.** Surface energies of the different plane obtained from the DFT calculations

| Plane      | Total E (eV) |                                                                                   | surface area X 2 | surface E (eV/A <sup>3</sup> ) |
|------------|--------------|-----------------------------------------------------------------------------------|------------------|--------------------------------|
| (001)_surf | -213.082     | Ce <sub>1</sub> Fe <sub>2</sub> Ni <sub>5</sub> O <sub>16</sub> H <sub>16</sub>   | 151.602816       | 0.012                          |
| (010)_surf | -209.268     | Ce <sub>1</sub> Fe <sub>2</sub> Ni <sub>5</sub> O <sub>16</sub> H <sub>16</sub>   | 60.092672        | 0.093                          |
| (100)_surf | -211.263     | Ce <sub>1</sub> Fe <sub>2</sub> Ni <sub>5</sub> O <sub>16</sub> H <sub>16</sub>   | 104.824884       | 0.034                          |
| (110)_surf | -209.61      | Ce <sub>1</sub> Fe <sub>2</sub> Ni <sub>5</sub> O <sub>16</sub> H <sub>16</sub>   | 120.823464       | 0.044                          |
| (111)_surf | -415.042     | Ce <sub>2</sub> Fe <sub>4</sub> Ni <sub>10</sub> O <sub>32</sub> H <sub>32</sub>  | 285.539084       | 0.051                          |
| (012)_surf | -1070.069    | Ce <sub>5</sub> Fe <sub>10</sub> Ni <sub>25</sub> O <sub>80</sub> H <sub>80</sub> | 306.5281044      | 0.014                          |

## References for SI

1. Perdew, J. P.; Burke, K.; Ernzerhof, M. Generalized Gradient Approximation Made Simple. *Phys. Rev. Lett.* 77, 18, 3865 (1996).
2. Kresse, G.; Furthmüller, J. Efficient iterative schemes for ab initio total-energy calculations using a plane-wave basis set. *Phys. Rev. B* 54, 16, 11169 (1996).
3. Wang, L.; Maxisch, T.; Ceder, G. Oxidation energies of transition metal oxides within the GGA+U framework. *Phys. Rev. B* 73, 195107 (2006).
4. Hestenes, M. R.; Steifel, E.; Methods of Conjugate Gradients for Solving. *J. Res. Natl. Bur. Stand.* 49, 409 (1952).
5. Grimme, S. Semiempirical GGA-type density functional constructed with a long-range dispersion correction. *J. Comput., Chem.* 27, 1787 (2006).
6. Yang, J., Shen, Y., Sun, Y., Xian, J., Long, Y. and Li, G., 2023. Ir nanoparticles anchored on metal-organic frameworks for efficient overall water splitting under pH-universal conditions. *Angewandte Chemie*, 135(17), p.e202302220.
7. Zang, Y., Lu, D.Q., Wang, K., Li, B., Peng, P., Lan, Y.Q. and Zang, S.Q., 2023. A pyrolysis-free Ni/Fe bimetallic electrocatalyst for overall water splitting. *Nature Communications*, 14(1), p.1792.
8. Jiang, M., Zhai, H., Chen, L., Mei, L., Tan, P., Yang, K. and Pan, J., 2023. Unraveling the synergistic mechanism of Bi-functional nickel–iron phosphides catalysts for overall water splitting. *Advanced Functional Materials*, 33(33), p.2302621.
9. Li, Y., Wang, W., Cheng, M., Feng, Y., Han, X., Qian, Q., Zhu, Y. and Zhang, G., 2023. Arming Ru with oxygen-vacancy-enriched RuO<sub>2</sub> sub-nanometer skin activates superior bifunctionality for pH-universal overall water splitting. *Advanced Materials*, 35(24), p.2206351.
10. Xu, W., Zhao, R., Li, Q., Sun, B., Wu, J., Zhong, W., Gao, Y., Nan, X., Huang, Q., Yang, Y. and Li, X., 2023. Overall Water Splitting on The NiS/NiS<sub>2</sub> Heterostructures Featuring Self-Equilibrium Orbital Occupancy. *Advanced Energy Materials*, 13(31), p.2300978.
11. Ma, G., Ye, J., Qin, M., Sun, T., Tan, W., Fan, Z., Huang, L. and Xin, X., 2023. Mn-doped NiCoP nanopin arrays as high-performance bifunctional electrocatalysts for sustainable hydrogen production via overall water splitting. *Nano Energy*, 115, p.108679.
12. Kandel, M.R., Pan, U.N., Dhakal, P.P., Ghising, R.B., Nguyen, T.T., Zhao, J., Kim, N.H. and Lee, J.H., 2023. Unique heterointerface engineering of Ni<sub>2</sub>P–MnP nanosheets coupled Co<sub>2</sub>P nanoflowers as hierarchical dual-functional electrocatalyst for highly proficient overall water-splitting. *Applied Catalysis B: Environmental*, 331, p.122680.
13. Li, B., Zhao, J., Wu, Y., Zhang, G., Wu, H., Lyu, F., He, J., Fan, J., Lu, J. and Li, Y.Y., 2023. Identifying Fe as OER active sites and ultralow-cost bifunctional electrocatalysts for overall water splitting. *Small*, 19(37), p.2301715.
14. Cao, D., Shao, J., Cui, Y., Zhang, L. and Cheng, D., 2023. Interfacial engineering of copper–nickel selenide nanodendrites for enhanced overall water splitting in alkali condition. *Small*, 19(33), p.2301613.
15. Wang, Y., Yang, P., Gong, Y., Liu, D., Liu, S., Xiao, W., Xiao, Z., Li, Z., Wu, Z. and Wang, L., 2023. Amorphous high-valence Mo-doped NiFeP nanospheres as efficient electrocatalysts for

- overall water-splitting under large-current density. *Chemical Engineering Journal*, 468, p.143833.
16. Ma, T., Shen, X., Jiao, Q., Zhao, Y., Li, H., Zhang, Y., Lv, Y., Feng, C. and Guo, L., 2023. In-situ construction of hexagonal-star-shaped MnCo<sub>2</sub>S<sub>4</sub>@ MoS<sub>2</sub> boosting overall water splitting performance at large-current-density: Compositional-electronic regulation, functions, and mechanisms. *Chemical Engineering Journal*, 464, p.142592.
  17. Zhang, X.Y., Yu, W.L., Zhao, J., Fu, J.Y., Dong, B., Wang, F.L., Yu, J.F., Liu, C.G. and Chai, Y.M., 2023. Self-supported Fe<sub>x</sub>Ni<sub>1-x</sub>MoO<sub>4</sub> with synergistic morphology and composition for efficient overall water splitting at large current density. *Chinese Chemical Letters*, 34(2), p.107422.
  18. Zhou, X., Mo, Y., Yu, F., Liao, L., Yong, X., Zhang, F., Li, D., Zhou, Q., Sheng, T. and Zhou, H., 2023. Engineering active iron sites on nanoporous bimetal phosphide/nitride heterostructure array enabling robust overall water splitting. *Advanced Functional Materials*, 33(6), p.2209465.
  19. Yu, D., Hao, Y., Han, S., Zhao, S., Zhou, Q., Kuo, C.H., Hu, F., Li, L., Chen, H.Y., Ren, J. and Peng, S., 2023. Ultrafast combustion synthesis of robust and efficient electrocatalysts for high-current-density water oxidation. *ACS nano*, 17(2), pp.1701-1712.
  20. Ma, W., Li, D., Liao, L., Zhou, H., Zhang, F., Zhou, X., Mo, Y. and Yu, F., 2023. High-Performance Bifunctional Porous Iron-Rich Phosphide/Nickel Nitride Heterostructures for Alkaline Seawater Splitting. *Small*, 19(19), p.2207082.
  21. Chen, W., Wei, W., Li, F., Wang, Y., Liu, M., Dong, S., Cui, J., Zhang, Y., Wang, R., Ostrikov, K. and Zang, S.Q., 2024. Tunable Built-In Electric Field in Ru Nanoclusters-Based Electrocatalyst Boosts Water Splitting and Simulated Seawater Electrolysis. *Advanced Functional Materials*, 34(7), p.2310690.
  22. Wu, L., Yu, L., Zhang, F., McElhenny, B., Luo, D., Karim, A., Chen, S. and Ren, Z., 2021. Heterogeneous bimetallic phosphide Ni<sub>2</sub>P-Fe<sub>2</sub>P as an efficient bifunctional catalyst for water/seawater splitting. *Advanced Functional Materials*, 31(1), p.2006484.
  23. Enkhtuvshin, E., Yeo, S., Choi, H., Kim, K.M., An, B.S., Biswas, S., Lee, Y., Nayak, A.K., Jang, J.U., Na, K.H. and Choi, W.Y., 2023. Surface reconstruction of Ni-Fe layered double hydroxide inducing chloride ion blocking materials for outstanding overall seawater splitting. *Advanced Functional Materials*, 33(22), p.2214069.
  24. Yu, L., Zhu, Q., Song, S., McElhenny, B., Wang, D., Wu, C., Qin, Z., Bao, J., Yu, Y., Chen, S. and Ren, Z., 2019. Non-noble metal-nitride based electrocatalysts for high-performance alkaline seawater electrolysis. *Nature communications*, 10(1), p.5106.
  25. Luo, Y., Wang, P., Zhang, G., Wu, S., Chen, Z., Ranganathan, H., Sun, S. and Shi, Z., 2023. Mn-doped nickel-iron phosphide heterointerface nanoflowers for efficient alkaline freshwater/seawater splitting at high current densities. *Chemical Engineering Journal*, 454, p.140061.
  26. Loomba, S., Khan, M.W., Haris, M., Mousavi, S.M., Zavabeti, A., Xu, K., Tadich, A., Thomsen, L., McConville, C.F., Li, Y. and Walia, S., 2023. Nitrogen-doped porous nickel molybdenum phosphide sheets for efficient seawater splitting. *Small*, 19(18), p.2207310.
  27. Liu, W., Que, W., Yin, R., Dai, J., Zheng, D., Feng, J., Xu, X., Wu, F., Shi, W., Liu, X. and Cao, X., 2023. Ferrum-molybdenum dual incorporated cobalt oxides as efficient bifunctional anti-corrosion electrocatalyst for seawater splitting. *Applied Catalysis B: Environmental*, 328, p.122488.
  28. Wang, X., Liu, X., Wu, S., Liu, K., Meng, X., Li, B., Lai, J., Wang, L. and Feng, S., 2023.

- Phosphorus vacancies enriched cobalt phosphide embedded in nitrogen doped carbon matrix enabling seawater splitting at ampere-level current density. *Nano Energy*, *109*, p.108292.
29. Jiang, K., Liu, W., Lai, W., Wang, M., Li, Q., Wang, Z., Yuan, J., Deng, Y., Bao, J. and Ji, H., 2021. NiFe layered double hydroxide/FeOOH heterostructure nanosheets as an efficient and durable bifunctional electrocatalyst for overall seawater splitting. *Inorganic chemistry*, *60*(22), pp.17371-17378.
